# Supplementary material for: Patient-Reported Opioid Consumption and Pain Intensity After Common Orthopedic and Urologic Surgical Procedures With Use of an Automated Text Messaging System
Source: PubMed Central journal article supplement (PMC7994954; doi:10.1001/jamanetworkopen.2021.3243), 2021-03-25

## Supplementary Online Content

Agarwal AK, Lee D, Ali Z, et al. Patient-reported opioid consumption and pain intensity after common orthopedic and urologic surgical procedures with use of an automated text messaging system. *JAMA Netw Open*. 2021;4(3):e213243. doi:10.1001/jamanetworkopen.2021.3243

### **eAppendix.**

This supplementary material has been provided by the authors to give readers additional information about their work.

## eAppendix

### Text Messaging Script Post-Operative Day 4

#### Consent: Q1

“Hi, this is Penn Medicine checking in about your recent procedure. Text ‘YES’ if we can ask a few questions about how you are managing your pain. Text ‘STOP’ anytime to opt-out. Click here: [bit.ly/2HJCIg4](https://bit.ly/2HJCIg4) to learn more about this program.

Texting is not secure. Other people may be able to see information in text messages. By texting back ‘YES’ you are accepting this risk. Message & data rates may apply.”

#### Q2:

*We wanted to see how you are doing after your recent procedure. We may check in a few times.  
[line break] How would you rate your pain over the past 24 hours? (from 0-10, 0 being no pain [please choose one number]).*”

#### LOGIC:

- If response  $\neq$  0-10  $\rightarrow$  REPLY *"I'm sorry. We don't understand. Please text back a number 0-10."*
- If no response in 3 hours  $\rightarrow$  REPLY *"We missed your response. How would you rate your surgical pain over the past 24 hours? (from 0-10, 0 being no pain [please choose only one number])."*

#### Q3:

*"We encourage you to contact your provider if your pain is too much to handle.  
[line break] How have you been able to manage your pain since being home? From 0-10, 0 being not at all able [please choose one number]."*

#### LOGIC:

- If response = 0-10  $\rightarrow$  Proceed to **Q4**
- If response  $\neq$  0-10  $\rightarrow$  REPLY *"I'm sorry. We don't understand. Please text back a number between 0-10."*
- If no response in 3 hours  $\rightarrow$  REPLY *"We missed your response. How have you been able to manage your pain since being home? From 0-10, 0 being not at all able [please choose one number]."*

#### Q4:

*"We just have a few more questions. [line break] Have you taken any of the following medications for your pain since your procedure (Acetaminophen, Aspirin, Ibuprofen, or Naproxen)? [Y for yes or N for no]."*

#### LOGIC:

- If response = Y, N, yes, or no  $\rightarrow$  Proceed to **Q5**
- If response  $\neq$  Y, N, yes or no  $\rightarrow$  REPLY *"I'm sorry. We don't understand. Please text back Y or N."*

#### Q5:

*"Thanks, this information helps guide our practice. It looks like you were also prescribed [narcotic\_RX] for your pain. [line break] Have you taken this medication? [Y for yes or N for no]."*

#### LOGIC:

- If response = Y or yes  $\rightarrow$  Proceed to **Q6**
- If response = N or no  $\rightarrow$  Proceed to **Q10**
- If response  $\neq$  Y, N, yes or no  $\rightarrow$  REPLY *"I'm sorry. We don't understand. Please text back Y or N."*

**Q6:** *"Can you estimate how many pills of [narcotic\_RX] you have taken since your procedure? Please text back a number"*

LOGIC:

- If response = Number → Proceed to **Q7**
- If response ≠ Number → REPLY *"I'm sorry. We don't understand. Please text back a number."*

**Q7:** *"Do you have any of these pills remaining? [Y/N]"*

LOGIC:

- If response = Y, yes → Proceed to **Q8**
- If response = N, no Proceed to **Q11**
- If response ≠ Y, N, yes or no → REPLY: *"I'm sorry. We don't understand. Please text back Y or N."*

**Q8:** *"Do you plan to continue taking [narcotic\_RX] to control your pain? [Y/N]"*

LOGIC:

- If response = Y or yes → REPLY: *"Thanks so much for your feedback! We'll check back with you in a few days. If you have any questions or concerns about your care or health please contact your surgical team. Have a nice day!"(Q9 ON MOSIO)*

**---This patient will be texted in 1 week---**

- If response = N or no → **Move to Q10**
- If response ≠ Y, N, yes or no → REPLY: *"I'm sorry. We don't understand. Please text back Y or N."*

**Q10:** *"Have you disposed of your unused %narcotic% medication? [Y/N]"*

LOGIC:

- If response = Y or Yes → That's great to hear. It's important to dispose of your unused medication. Just one more question for you: [line break] *"How many days did it take for your pain to improve after your procedure? Please text back a number." (Q12 ON MOSIO)*
- If response = N or No → It's important to dispose of your unused medication. Penn pharmacies will take them back. Find locations here: <https://bit.ly/2VQPekA>. [line break] Just one more question for you: *"How many days did it take for your pain to improve after your procedure? Please text back a number." (Q13 ON MOSIO)*

**Q11:** *"Thank you so much! Just one more question for you. How many days did it take for your pain to improve after your procedure?"*

LOGIC:

- If response = Number → REPLY *"Thanks so much for your feedback! If you have any questions or concerns about your care or health, please contact your surgical team. (Q14 ON MOSIO)"*
- If response ≠ Number → REPLY *"I'm sorry. We don't understand. Please text back a number."*

**---END MARK COMPLETE---**

**Post-Operative Days 7, 14, and 21**

**Q1:**

*“Hi, this is Penny Bot from Penn Medicine! We’re checking back in to see how you’re doing. Text STOP anytime to opt out. [line break] How would you rate your pain over the past 24 hours? (from 0-10, 0 being no pain [please choose one number]).*

LOGIC:

- If response ≠ 0-10 → REPLY *“I’m sorry. We don’t understand. Please text back a number 0-10.”*

**Q2:**

*“We encourage you to contact your provider if your pain is too much to handle. [line break] How have you been able to manage your pain over the past 3 days(“over the past week” if days 14 and 21)? From 0-10, 0 being not at all able [please choose only one number].”*

LOGIC:

- If response =0-10 → Proceed to **Q3**
- If response ≠ 0-10 → REPLY *“I’m sorry. We don’t understand. Please text back a number between 0-10.”*

**Q3:**

*“We just have a few more questions.[line break] Have you taken any of the following medications for your pain over the past 3 days(“over the past week” if days 14 and 21)(Acetaminophen, Aspirin, Ibuprofen, or Naproxen)? [Y for yes or N for no]. “*

LOGIC:

- If response = Y, N, yes, or no → Proceed to **Q4**
- If response ≠ Y, N, yes or no → REPLY *“I’m sorry. We don’t understand. Please text back Y or N.”*

**Q4:**

*“Thanks, this information helps guide our practice. Have you taken [narcotic\_RX] for your pain over the past 3 days(“over the past week” if days 14 and 21)? [Y for yes or N for no].”*

LOGIC:

- If response = Y or yes → Proceed to **Q5**
- If response = N or no → Proceed to **Q9**
- If response ≠ Y, N, yes or no → REPLY *“I’m sorry. We don’t understand. Please text back Y or N.”*

**Q5:** *“Can you estimate how many pills of [narcotic\_RX] you have taken in the past 3 days? Please text back a number.”*

LOGIC:

- If response = Number → Proceed to **Q6**
- If response ≠ Number → REPLY *“I’m sorry. We don’t understand. Please text back a number.”*

**Q6:** *“Do you have any of these pills remaining? [Y/N]”*

LOGIC:

- If response = Y, yes → Proceed to **Q7**
- If response = N, no → Proceed to **Q10**
- If response ≠ Y, N, yes or no → REPLY: *“I’m sorry. We don’t understand. Please text back Y or N.”*

**Q7:** *“Do you plan to continue taking [narcotic\_RX] to control your pain? [Y/N]”*

LOGIC:

- If response = Y or yes → REPLY: *“Thanks so much for your feedback! We’ll check back with you in a few days. If you have any questions or concerns about your care or health please contact your provider. Have a nice day!” (Q8 ON MOSIO)*

---This patient will be texted in 1 week---

- If response = N or no → **Move to Q9.**
- If response ≠ Y, N, yes or no → REPLY: *"I'm sorry. We don't understand. Please text back Y or N."*

**Q9:** "Have you disposed of your unused %narcotic% medication? [Y/N]"

LOGIC:

- If response = Y or Yes → That's great to hear. It's important to dispose of your unused medication. Just one more question for you: [line break] *"How many days did it take for your pain to improve after your procedure? Please text back a number."* (**Q11 ON MOSIO**)
- If response = N or No → It's important to dispose of your unused medication. Penn pharmacies will take them back. Find locations here: <https://bit.ly/2VQPekA>. [line break] Just one more question for you: *"How many days did it take for your pain to improve after your procedure? Please text back a number."* (**Q12 ON MOSIO**)

**Q10:**

*"Thank you so much! Just one more question for you. How many days did it take for your pain to improve after your procedure?"*

LOGIC:

- If response = Number → REPLY "Thanks so much for your feedback! If you have any questions or concerns about your care or health please contact your surgical team." (**Q13 ON MOSIO**)
- If response ≠ Number → REPLY *"I'm sorry. We don't understand. Please text back a number."*

---END MARK COMPLETE---

**Day 28**

**Q1:**

*"Hi, this is Penny Bot from Penn Medicine! We're checking back in to see how you're doing. [line break] How would you rate your surgical pain over the past 24 hours? (from 0-10, 0 being no pain [please choose one number])."*

LOGIC:

- If response ≠ 0-10 → REPLY *"I'm sorry. We don't understand. Please text back a number 0-10."*

**Q2:**

*"We encourage you to contact your surgical team if your pain is too much to handle. [line break] How have you been able to manage your pain over the past week? From 0-10, 0 being not at all able [please choose only one number]."*

LOGIC:

- If response = 0-10 → Proceed to **Q3**
- If response ≠ 0-10 → REPLY *"I'm sorry. We don't understand. Please text back a number between 0-10."*

**Q3:**

*"We appreciate your response. We just have a few more questions.[line break] Have you taken any of the following medications for your pain over the past week(Acetaminophen, Aspirin, Ibuprofen, or Naproxen)? [Y for yes or N for no]."*

LOGIC:

- If response = Y, N, yes, or no → Proceed to **Q4**
- If response ≠ Y, N, yes or no → REPLY "I'm sorry. We don't understand. Please text back Y or N."

**Q4:**  
*"Thanks, this information helps guide our practice. Have you taken [narcotic\_RX] for your pain over the past week? [Y for yes or N for no]."*

LOGIC:

- If response = Y or yes → Proceed to **Q5**
- If response = N or no → Proceed to **Q9**
- If response ≠ Y, N, yes or no → REPLY "I'm sorry. We don't understand. Please text back Y or N."

**Q5:** *"Can you estimate how many pills of [narcotic\_RX] you have taken over the past week? Please text back a number"*  
 LOGIC:

- If response = Number → Proceed to **Q6**
- If response ≠ Number → REPLY "I'm sorry. We don't understand. Please text back a number."

**Q6:** *"Do you have any of these pills remaining? [Y/N]"*

LOGIC:

- If response = Y, yes → Proceed to **Q7**
- If response = N, no → Proceed to **Q9**
- If response ≠ Y, N, yes or no → REPLY: "I'm sorry. We don't understand. Please text back Y or N."

**Q7:** *"Do you plan to continue taking [narcotic\_RX] to control your pain? [Y/N]"*

LOGIC:

- If response = Y or yes → **Proceed to Q10**
- If response = N or no → **Move to Q8.**
- If response ≠ Y, N, yes or no → REPLY: "I'm sorry. We don't understand. Please text back Y or N."

**Q8:** *"Have you disposed of your unused %narcotic% medication? [Y/N]"*

LOGIC:

- If response = Y or Yes → That's great to hear. It's important to dispose of your unused medication. Just one more question for you: [line break] *"How many days did it take for your pain to improve after your procedure? Please text back a number."* (**Q11**)
- If response = N or No → It's important to dispose of your unused medication. Penn pharmacies will take them back. Find locations here: <https://bit.ly/2VQPeKA>. [line break] Just one more question for you: *"How many days did it take for your pain to improve after your procedure? Please text back a number."* (**Q12**)

**Q9:**  
*"Thank you so much! Just one more question for you. How many days did it take for your pain to improve after your procedure?"*

LOGIC:

- If response = Number → REPLY "Thanks so much for your feedback! If you have any questions or concerns about your care or health please contact your surgical team." (**Q13**)

- If response  $\neq$  Number  $\rightarrow$  REPLY "I'm sorry. We don't understand. Please text back a number."

**Q10:**

Thanks! When you're finished, it's important to dispose of unused %narcotic%. Penn pharmacies will take them. Find locations here: <https://bit.ly/2VQPeKA>. [line break] Just one more question for you. How many days did it take for your pain to improve after your procedure?"

**LOGIC:**

- If response = Number  $\rightarrow$  REPLY "Thanks so much for your feedback! If you have any questions or concerns about your care or health please contact your surgical team." (Q14)
- If response  $\neq$  Number  $\rightarrow$  REPLY "I'm sorry. We don't understand. Please text back a number."

Flowchart of respondents over time:

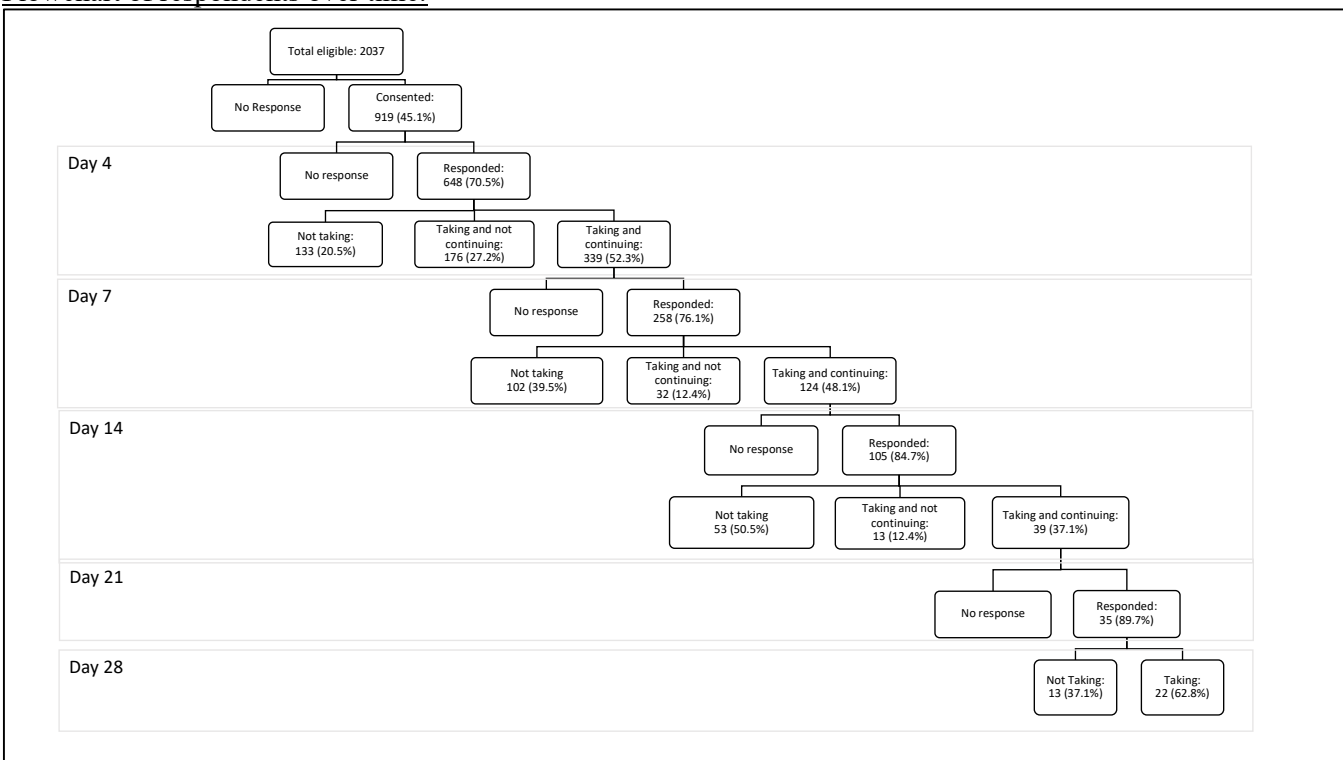

Supplement: jamanetwopen-e213243-s001.pdf [file jamanetwopen-e213243-s001.pdf]
